# Supplementary material for: Complementary Feeding Practices in Northern Ghana: A Mixed- Methods Study of Prevalence, Predictors, and Socio-cultural Influences
Source: Research Square preprint supplement (doi:10.21203/rs.3.rs-7453597/v1), 2025-10-23
Supplement: Supplementary file 2 [file 5835570e8a75631b0503cbb1.docx]

**INTERVIEW GUIDE FOR QUALITATIVE**

**TOPIC: ASSESSING THE ROLE OF SOCIOCULTURAL FACTORS ON COMPLEMENTARY FEEDING PRACTICES IN THE YENDI MUNICIPALITY**

**INTRODUCTION**

The main objective of the study is to investigate socio-demographic and cultural influences on child feeding practices in the Yendi Municipality of Ghana. You are assured that all responses provided would be strictly confidential and used for academic purposes only. Please, your anonymity is guaranteed and your participation in this study is voluntary; however, your decision to participate will be highly appreciated. Thank you for your cooperation.

**Section A: Background Information of the Respondents**

1. Age of respondents
2. Parity
3. Religion
4. Ethnicity
5. Educational level
6. Occupation

**Section B: Beliefs about initiating complementary feeding**

1. When did you start feeding your child with liquid/semi-solid/solid foods? What was the reason for initiating feeding at this time? ***Probe:*** Was your decision to initiate feeding at this time influenced by someone or group of people (***hints:*** mother-in-laws, husbands, grandmothers etc.)
2. Kindly elaborate on the signs you look for before initiating complementary feeding?
3. Are there any benefits/consequences associated with the time of initiating complementary feeding? Kindly elaborate.

**Section c: Beliefs and misconceptions against complementary feeding**

1. What foods are usually given to children during complementary feeding? ***Probe:*** what are the relevance of these foods mentioned to the child?
2. What are some cultural beliefs, taboos, superstitions, norms and traditions associated with complementary feeding? ***Probe:*** Are there any foods that children are forbidden to eat? Kindly elaborate on these foods and why they are forbidden.
3. Do religious leaders play a role in deciding what foods children should eat? How is their influence?
4. Do you have anything to add to this discussion?

***Thank you for your time!!!***
